# Supplementary material
Source: Springer Nature journal article supplement (https://www.springermedizin.de/resource/supplementary/12990_2008_142_MOESM1_ESM.pdf/9612662)

# A PB-CeLC

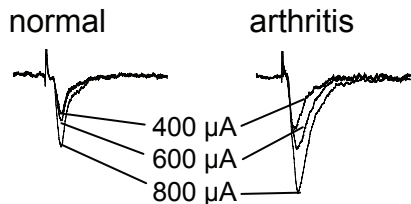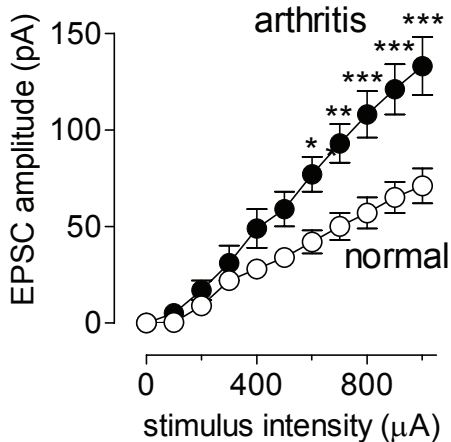

# B BLA-CeLC

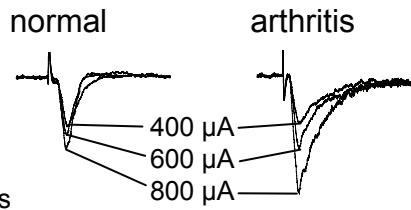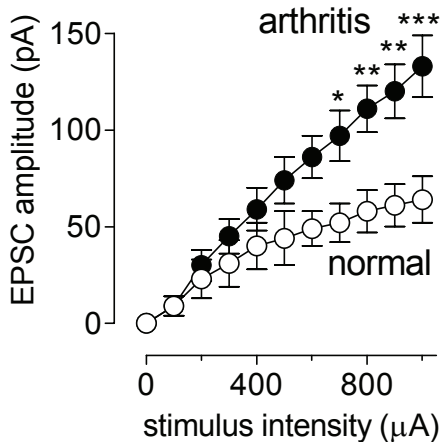

Supplement: MOESM1 [file 9612662]
